# Supplementary material for: Cost-effectiveness of a Smoking Cessation Intervention for Parents in Pediatric Primary Care
Source: PubMed Central journal article supplement (PMC8017473; doi:10.1001/jamanetworkopen.2021.3927), 2021-04-01
Supplement: jamanetwopen-e213927-s001.pdf [file jamanetwopen-e213927-s001.pdf]

## Supplemental Online Content

Drouin O, Sato R, Drehmer JE, et al. Cost-effectiveness of a smoking cessation intervention for parents in pediatric primary care. *JAMA Netw Open*. 2021;4(4):e213927. doi:10.1001/jamanetworkopen.2021.3927

**eTable 1.** Wage

**eTable 2.** Detailed List of Cost Items

**eTable 3.** Types of Distribution and Variability Assessment Method for Each Cost Item

**eFigure.** Scatter Plots of Incremental Effectiveness (%) and Incremental Cost per Smoker Illustrating How the Cost (Numerator) and Effectiveness (Denominator) Values Vary With One Another 10,000 Probabilistic Sensitivity Analysis Simulations

This supplemental material has been provided by the authors to give readers additional information about their work.

eTable 1: Wage

| <b>Occupation title</b> | <b>Corresponding occupation title in Bureau of Labor Statistics</b> | <b>Hourly wage + fringe</b> |
|-------------------------|---------------------------------------------------------------------|-----------------------------|
| Senior Pediatrician     | Pediatricians, General; 75th+ percentile                            | \$133.00                    |
| Pediatrician            | Pediatricians, General                                              | \$109.06                    |
| Project Manager         |                                                                     | \$66.50                     |
| Research Assistant      |                                                                     | \$15.96                     |
| Registered Nurse        | Registered Nurses                                                   | \$45.86                     |
| Nurse Practitioner      | Nurse Practitioners                                                 | \$68.44                     |
| Practice Manager        | Office manager (AAP) <sup>1</sup>                                   | \$33.68                     |
| "Practice Staff"        | Receptionists and Information Clerks - Office of physicians         | \$18.63                     |
| Medical Assistant       | Medical Assistants                                                  | \$21.49                     |

<sup>1</sup>: Wage for this occupation comes from suggested guidelines from the American Academy of Pediatrics

eTable 2: Detailed List of Cost Items

| <b>Cost</b>                                                                                                                                                                                                 | <b>Random component</b>                                        | <b>Fixed component</b>                                  |
|-------------------------------------------------------------------------------------------------------------------------------------------------------------------------------------------------------------|----------------------------------------------------------------|---------------------------------------------------------|
| <b>Fixed costs</b>                                                                                                                                                                                          |                                                                |                                                         |
| <i>Pre-implementation</i>                                                                                                                                                                                   |                                                                |                                                         |
| Peer-to-peer training                                                                                                                                                                                       | wage, total costs (site-specific)                              | # workers, # minutes                                    |
| Training video viewing time                                                                                                                                                                                 | wage, % of video watched                                       | # minutes of video time, # workers                      |
| Whole office training call                                                                                                                                                                                  | wage, total costs (site-specific)                              | # minutes of call time, # workers                       |
| Tablet computers                                                                                                                                                                                            |                                                                | # tablets, # 4G network extender                        |
| UMass TTS Training                                                                                                                                                                                          | wage, total costs (site-specific)                              | Registration cost, # workers, # hours of training time  |
| <i>Post-implementation</i>                                                                                                                                                                                  |                                                                |                                                         |
| Check-in call (1 <sup>st</sup> month)                                                                                                                                                                       | wage, # minutes call                                           | # calls, # workers                                      |
| Pharmacy calls                                                                                                                                                                                              | wage, # minutes call, # pharmacies                             |                                                         |
| Pharmacy letters                                                                                                                                                                                            | wage, # pharmacies                                             | price of postage, price of envelope/printing            |
| <b>Variable costs</b>                                                                                                                                                                                       |                                                                |                                                         |
| Monthly report preparation                                                                                                                                                                                  | wage, # minutes call                                           | # calls, # workers                                      |
| Tablet computers data plan                                                                                                                                                                                  |                                                                | # tablets                                               |
| Check-in calls                                                                                                                                                                                              | wage, # minutes call                                           | # calls per month, # workers                            |
| In office tablet management (with parents)                                                                                                                                                                  | wage, # minute per smoker, # minutes per non-smoker, % smokers | # days, # workers                                       |
| In-office tablet management (end of each day)                                                                                                                                                               | wage, # minutes per day                                        | # days, # workers                                       |
| Parent letters                                                                                                                                                                                              | wage, # minutes from RA                                        | price of postage, price of envelope/printing, # letters |
| Parent calls (one practice only)                                                                                                                                                                            | wage, # hours call per week                                    | # weeks                                                 |
| Quitline report management time                                                                                                                                                                             | wage, # minutes                                                | # report per year, # years, # workers                   |
| One-year whole office call                                                                                                                                                                                  | wage, total costs (site-specific)                              | # workers                                               |
| Programmatic support                                                                                                                                                                                        | wage, # minutes                                                | # months, # workers                                     |
| Notes: Variation in wages is determined by a wage multiplier. The wage multiplier was made under the assumption that wages for all job types vary together (for example, due to local economic conditions). |                                                                |                                                         |

eTable 3: Types of Distribution and Variability Assessment Method for Each Cost Item

| Category                                      | Item                        | Type of distribution used | Standard deviation observed vs. assumed |
|-----------------------------------------------|-----------------------------|---------------------------|-----------------------------------------|
| <b>General</b>                                | wage                        | normal                    | assumed                                 |
| <b>Fixed costs</b>                            |                             |                           |                                         |
| Pre-implementation                            |                             |                           |                                         |
| Peer-to-peer training                         | total costs (site-specific) | normal                    | observed                                |
| Training video viewing time                   | % of video watched          | uniform                   | assumed                                 |
| Whole office training call                    | total costs (site-specific) | normal                    | observed                                |
| UMass TTS Training                            | total costs (site-specific) | normal                    | observed                                |
| Post-implementation                           |                             |                           |                                         |
| Check-in call (1st month)                     | # minutes call              | normal                    | assumed                                 |
| Pharmacy calls                                | # minutes call              | normal                    | assumed                                 |
| Pharmacy calls / Pharmacy letters             | # pharmacies                | normal                    | assumed                                 |
| <b>Variable costs</b>                         |                             |                           |                                         |
| Monthly report preparation                    | # minutes call              | normal                    | assumed                                 |
| Check-in calls                                | # minutes call              | normal                    | assumed                                 |
| In office tablet management (with parents)    | # minute per smoker         | log normal                | observed                                |
|                                               | # minutes per non-smoker    | log normal                | observed                                |
|                                               | % smokers                   | normal                    | assumed                                 |
| In-office tablet management (end of each day) | # minutes                   | normal                    | assumed                                 |
| Parent letters                                | # minutes from RA           | normal                    | assumed                                 |
| Parent calls (one practice only)              | # hours call                | normal                    | assumed                                 |
| Quitline report management time               | # minutes                   | normal                    | assumed                                 |
| One-year whole office call                    | total costs (site-specific) | normal                    | observed                                |
| Programmatic support                          | # minutes                   | normal                    | observed                                |

eFigure: Scatter Plots of Incremental Effectiveness (%) and Incremental Cost per Smoker Illustrating How the Cost (Numerator) and Effectiveness (Denominator) Values Vary With One Another 10,000 Probabilistic Sensitivity Analysis Simulations

Panel A: Change in parent-reported smoking prevalence

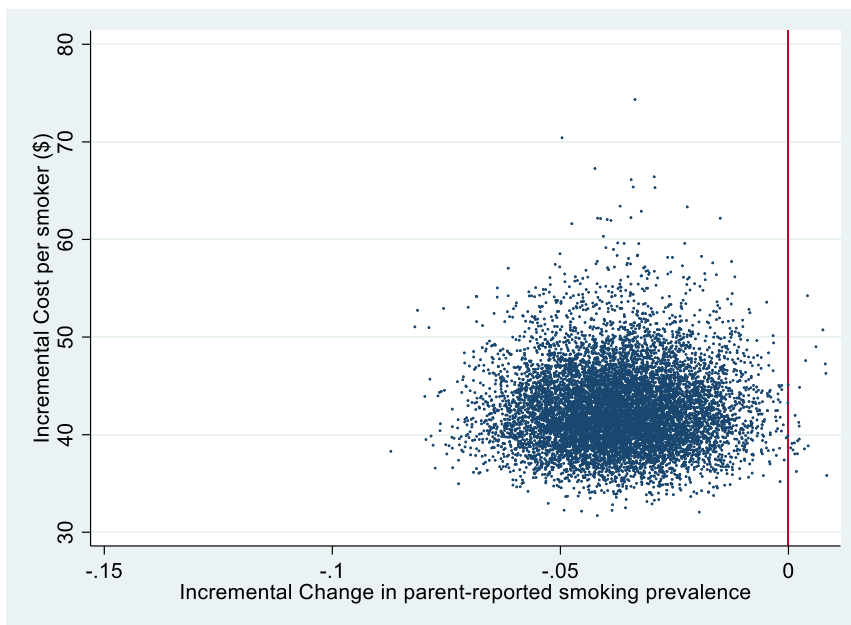

Panel B: Cotinine-confirmed smoking cessation

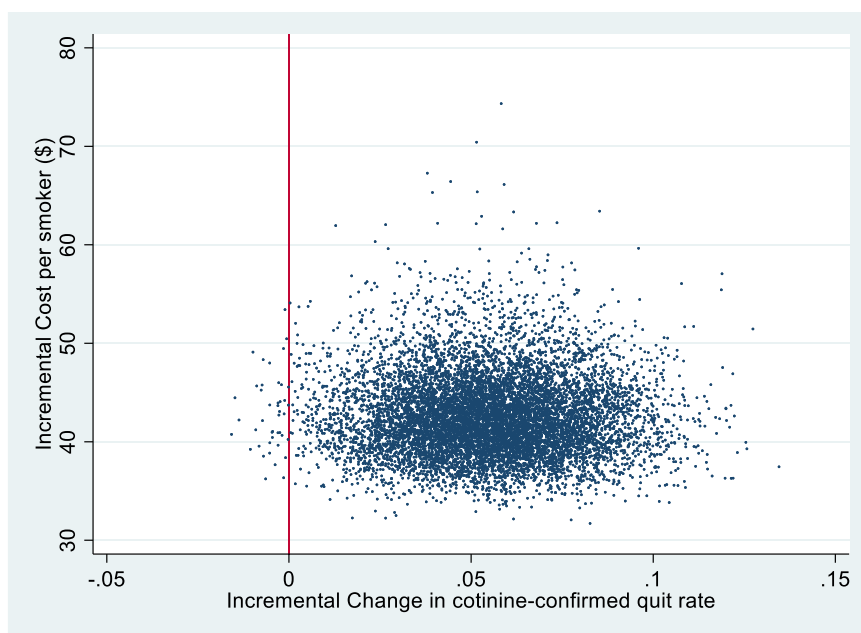

These graphs represent the joint 95% confidence intervals on both incremental effectiveness and incremental cost per smoker.
